# Supplementary material
Source: publisher figshare collection journal article supplement (https://tandf.figshare.com/ndownloader/files/17722274)
Supplement: Supplementary file 1 [file 17722274]

Appendix1.

Table A1. Patients’ characteristics by response to DCE (N=142).

|  | **Responders (N=75)** | **Not responders (N=67)** |
| --- | --- | --- |
| **Characteristics** | **N %** | **N %** |
| Age*, mean years (SD) | 61.6 (10.6) | 67.8 (8.5) |
| ≥ 65 years | 34 45.3 | 41 55.7 |
| Gender: male | 39 52.0 | 39 58.2 |
| Education level*: High school or degree | 38 50.7 | 19 28.4 |
| Living with partner | 48 64.0 | 45 67.2 |
| Type of cancer:  Colon  Rectum | 44 58.7  31 41.3 | 37 55.2  30 44.8 |
| Cancer stage: III or IV | 50 74.6 | 62 82.7 |
| IN-PATSAT32 doctors’scales, mean years (SD) |  |  |
| technical skills | 75.7 (19.4) | 79.5 (21.1) |
| interpersonal skills | 73.7 (23.0) | 74.9 (22.9) |
| information provision | 74.8 (23.5) | 76.1 (22.5) |
| availability | 72.3 (23.9) | 76.3 (21.9) |
| IN-PATSAT32 nurses’scales, mean years (SD) |  |  |
| technical skills | 77.7 (18.2) | 77.4 (22.9) |
| interpersonal skills | 78.8 (19.0) | 77.6 (21.7) |
| information provision | 70.0 (25.2) | 65.5 (33.5) |
| availability | 76.7 (21.5) | 76.2 (22.4) |
| IN-PATSAT32 hospital scales, mean years (SD) |  |  |
| Other hospital staff interpersonal skills | 69.3 (22.3) | 78.4 (21.3) |
| Waiting time | 69.7 (23.5) | 74.8 (20.9) |
| Hospital access | 58.8 (26.1) | 61.7 (25.5) |
| Exchange information | 71.0 (23.6) | 72.7 (26.4) |
| Hospital comfort | 70.7 (21.1) | 72.3 (25.0) |
| General satisfaction | 75.7 (20.5) | 81.0 (20.5) |

SD Standard Deviation;

* indicates differences statistically significant at p value<0.05 (wilcoxon test for continuous variable; Fisher exact test for categorical variable)

Table A2. Patients’ characteristics by stage of disease among respondents to the DCE (N=75).

|  | **Stage I-II (N=13)** | **Stage III-IV (N=62)** |
| --- | --- | --- |
| **Characteristics** | **N %** | **N %** |
| Age, mean years (SD) | 64.4 (8.5) | 60.8 (10.9) |
| ≥ 65 years | 9 69.2 | 25 40.3 |
| Gender: male | 8 61.5 | 31 50.0 |
| Education level: High school or degree | 7 53.8 | 31 50.0 |
| Living with partner | 11 84.6 | 37 54.7 |
| Type of cancer:  Colon  Rectum | 8 38.5  5 61.5 | 26 41.9  36 58.1 |
| IN-PATSAT32 doctors’scales, mean years (SD) |  |  |
| technical skills | 75.0 (20.7) | 75.8 (19.3) |
| interpersonal skills | 77.6 (22.7) | 72.8 (23.2) |
| information provision | 76.9 (22.6) | 74.3 (23.8) |
| availability | 76.0 (23.6) | 71.6 (24.1) |
| IN-PATSAT32 nurses’scales, mean years (SD) |  |  |
| technical skills | 75.6 (18.5) | 78.1 (18.2) |
| interpersonal skills | 76.3 (18.3) | 79.3 (19.2) |
| information provision | 73.7 (26.1) | 69.3 (25.1) |
| availability | 75.0 (22.8) | 77.0 (21.4) |
| IN-PATSAT32 hospital scales, mean years (SD) |  |  |
| Other hospital staff interpersonal skills | 69.2 (26.9) | 69.4 (21.4) |
| Waiting time | 71.2 (28.6) | 69.4 (22.5) |
| Hospital access | 46.2 (25.2) | 61.5 (25.6) |
| Exchange information | 75.0 (22.8) | 70.2 (23.9) |
| Hospital comfort | 75.0 (22.8) | 69.8 (20.8) |
| General satisfaction | 75.0 (22.8) | 75.8 (20.2) |

SD Standard Deviation;

Table A3. Patients’ characteristics by cancer site among respondents to the DCE (N=75).

|  | **Rectum (N=31)** | **Colon (N=44)** |
| --- | --- | --- |
| **Characteristics** | **N %** | **N %** |
| Age, mean years (SD) | 61.2 (8.9) | 61.9 (11.7) |
| ≥ 65 years | 11 35.5 | 23 52.3 |
| Gender: male | 14 45.2 | 25 56.8 |
| Education level: High school or degree | 15 48.4 | 23 52.3 |
| Living with partner | 17 54.8 | 31 70.4 |
| Stage: III or IV | 26 83.9 | 36 81.2 |
| IN-PATSAT32 doctors’scales, mean years (SD) |  |  |
| technical skills | 73.7 (19.4) | 77.1 (19.5) |
| interpersonal skills | 74.2 (21.4) | 73.3 (24.3) |
| information provision | 77.2 (22.1) | 73.1 (24.4) |
| availability | 72.2 (21.1) | 72.4 (25.9) |
| IN-PATSAT32 nurses’scales, mean years (SD) |  |  |
| technical skills | 75.0 (17.5) | 79.5 (18.6) |
| interpersonal skills | 78.0 (16.3) | 79.4 (20.8) |
| information provision | 68.9 (19.9) | 70.8 (28.5) |
| availability | 74.7 (22.2) | 78.1 (21.1) |
| IN-PATSAT32 hospital scales, mean years (SD) |  |  |
| Other hospital staff interpersonal skills | 67.2 (20.2) | 70.8 (23.7) |
| Waiting time* | 61.7 (23.0) | 75.3 (22.3) |
| Hospital access | 54.8 (27.5) | 61.6 (24.9) |
| Exchange information | 69.4 (20.1) | 72.2 (26.0) |
| Hospital comfort | 66.9 (20.8) | 73.3 (21.2) |
| General satisfaction | 71.8 (20.2) | 78.4 (20.6) |

SD Standard Deviation;

* indicates differences statistically significant at p value<0.05 (Wilcoxon test for continuous variable; Fisher exact test for categorical variable)
